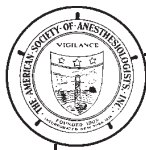

## Nominations Sought for Award for Excellence in Research

**The annual ASA Award for Excellence in Research recognizes an individual for outstanding achievement in research that has or is likely to have an important impact on the practice of anesthesiology.**

The individual's work must represent a body of original, mature, and sustained contribution to the advancement of the science of anesthesiology. The nominee need not be a physician, an anesthesiologist, or a member of ASA, but must be presently engaged in research related to anesthesiology.

The 2006 award was presented to Nicholas P. Franks at the ASA Annual Meeting in Chicago, Illinois, immediately preceding the Emery A. Rovenstine Memorial Lecture on Monday, October 16, 2006. Dr. Franks is a Professor in the Biophysics Section, Blackett Laboratory, Imperial College, London, England.

The deadline for nominations for the 2007 Award for Excellence in Research is March 31, 2007. Guidelines for nominations are available from the ASA Executive Office, 520 N. Northwest Highway, Park Ridge, IL 60068-2573 or e-mail [J.Jacobson@ASAhq.org](mailto:J.Jacobson@ASAhq.org).

## Call for Candidates for Presidential Scholar Award

**The ASA Presidential Scholar Award recognizes colleagues who dedicate their formative careers to research.**

The recipient of the Third Annual Presidential Scholar Award was Zhiyi Zuo, M.D., Ph.D., who received his award and delivered the Presidential Scholar Award lecture at the ASA Annual Meeting in Atlanta, Georgia, on Monday, October 24, 2005, following the Emery A. Rovenstine Memorial Lecture. Dr. Zuo is an Associate Professor in the Departments of Anesthesiology, Neuroscience, and Neurological Surgery at the University of Virginia, Charlottesville, Virginia.

The deadline for nominations for the 2007 Presidential Scholar Award is March 31, 2007. Anesthesiologists who are within seven years of their first appointment to a department of anesthesiology, who are board-certified, and who spend at least two days per week in clinical practice are eligible for the award. Candidates should be nominated by their department chair, who should submit each nominee's curriculum vitae and copies of three exemplary articles (published or in press). Full guidelines for nominations are available from the ASA Executive Office, 520 N. Northwest Highway, Park Ridge, IL 60068-2573 or e-mail [J.Jacobson@ASAhq.org](mailto:J.Jacobson@ASAhq.org).
